# Supplementary material for: Prevalence of Fusarium fungi and Deoxynivalenol Levels in Winter Wheat Grain in Different Climatic Regions of Poland
Source: MDPI journal article supplement (doi:10.3390/toxins14020102), 2022-01-28
Supplement: s1 [file s1]

# Supplementary Materials: Prevalence of *Fusarium* fungi and Deoxynivalenol Levels in Winter Wheat Grain in Different Climatic Regions of Poland

Adam Okorski, Alina Milewska, Agnieszka Pszczółkowska, Krzysztof Karpiesiuk, Wojciech Kozera, Joanna A. Dąbrowska and Justyna Radwińska

Table S1. Fungi isolated from winter wheat grain.

| Species/Genus                       | Bezek |      | Białogard |      | Kościelna Wieś |      | Pawłowice |      | Ruska Wieś |      | Sulejów |      | Tomaszów Bolesławiecki |      | Total |
|-------------------------------------|-------|------|-----------|------|----------------|------|-----------|------|------------|------|---------|------|------------------------|------|-------|
|                                     | 2015  | 2016 | 2015      | 2016 | 2015           | 2016 | 2015      | 2016 | 2015       | 2016 | 2015    | 2016 | 2015                   | 2016 |       |
| <i>Alternaria alternata</i>         | 86    | 134  | 60        | 66   | 52             | 124  | 65        | 102  | 88         | 23   | 43      | 91   | 58                     | 123  | 1115  |
| <i>Aureobasidium bolleyi</i>        |       |      |           | 1    |                |      |           |      |            |      |         |      |                        | 2    | 3     |
| <i>Cladosporium cladosporioides</i> |       |      | 1         |      |                |      | 2         |      | 1          | 1    | 2       |      | 2                      | 3    | 12    |
| <i>Drechslera biseptata</i>         |       |      | 2         |      |                |      | 4         |      |            |      |         | 1    |                        |      | 7     |
| <i>Drechslera tritici-repentis</i>  |       | 4    |           |      |                |      |           |      |            |      |         |      |                        |      | 4     |
| <i>Epicoccum nigrum</i>             | 29    | 14   | 7         | 9    | 3              | 16   | 79        | 7    | 41         | 3    | 30      | 9    | 11                     | 14   | 272   |
| <i>Fusarium avenaceum</i>           |       |      | 1         | 10   |                | 3    |           |      | 1          | 8    |         |      |                        |      | 23    |
| <i>F. culmorum</i>                  |       |      | 3         | 2    |                |      |           |      | 1          | 2    |         |      |                        |      | 8     |
| <i>F. equiseti</i>                  |       | 1    |           |      |                |      |           |      |            |      |         |      |                        |      | 1     |
| <i>F. graminearum</i>               |       | 2    |           |      |                |      |           |      |            | 1    |         |      |                        |      | 3     |
| <i>F. oxysporum</i>                 |       |      |           | 1    |                |      |           |      |            | 1    |         | 1    |                        |      | 3     |
| <i>F. poae</i>                      | 4     | 3    | 1         | 2    | 1              | 1    | 4         | 3    | 9          | 2    | 6       | 1    | 1                      | 2    | 40    |
| <i>F. tricinctum</i>                | 2     |      |           |      |                |      |           | 1    | 2          |      |         |      | 5                      |      | 10    |
| <i>F. sporotrichioides</i>          |       |      |           |      |                |      |           |      |            | 1    |         | 1    |                        |      | 2     |
| <i>Fusarium</i> spp.                |       |      |           | 1    | 2              |      |           |      |            | 2    | 1       | 1    |                        |      | 7     |
| <i>Bipolaris sorokiniana</i>        |       |      |           |      |                |      |           |      |            |      |         | 1    |                        |      | 1     |
| <i>Nigrospora oryzae</i>            |       | 2    |           |      |                | 1    |           |      |            |      |         |      |                        |      | 3     |
| <i>Penicilium</i> spp.              | 1     |      |           |      | 8              |      | 1         | 3    |            | 1    |         | 2    |                        |      | 16    |
| <i>Rhizopus nigricans</i>           |       |      |           | 2    |                |      | 4         |      | 8          | 16   | 4       |      | 2                      | 3    | 39    |
| <i>Stemphylium</i> spp.             |       | 2    |           |      |                | 5    |           |      |            |      |         | 1    |                        |      | 8     |
| <i>Trichoderma</i> spp.             |       |      |           |      |                |      |           | 9    | 2          |      |         |      |                        |      | 11    |
| Non-sporulating fungi               |       |      | 10        |      |                |      |           |      |            |      |         |      |                        |      | 10    |
| Total                               | 122   | 162  | 85        | 94   | 66             | 150  | 155       | 129  | 153        | 61   | 86      | 109  | 79                     | 147  | 1598  |

**Table S2.** Results of qPCR detection of fungal DNA and DON contamination in wheat grain across locations and years of the study.

| Location (A)                   | Year (B) | <i>F. culmorum</i> | <i>F. graminearum</i> | <i>F. avenaceum/ F. tricinctum</i> | <i>F. poae</i> | <i>P. verrucosum</i> | DON (µg/kg) |
|--------------------------------|----------|--------------------|-----------------------|------------------------------------|----------------|----------------------|-------------|
| Ruska Wieś                     | 2015     | 1.24               | 27.47                 | 76.34                              | 1540.53        | 912.63               | 32.48       |
|                                | 2016     | 0.58               | 8.14                  | 3695.52                            | 202.71         | 155.02               | 18.38       |
| Bezek                          | 2015     | 1.50               | 256.43                | 200.22                             | 202.69         | 1.41                 | 90.30       |
|                                | 2016     | 1.30               | 121.09                | 35.95                              | 98.73          | 0.44                 | 70.80       |
| Kościelna Wieś                 | 2015     | 8.85               | 87.62                 | 20.04                              | 17.54          | 114.76               | 102.03      |
|                                | 2016     | 0.95               | 6.76                  | 1751.45                            | 60.86          | 106.86               | 12.00       |
| Pawłowice                      | 2015     | 10.17              | 224.74                | 34.31                              | 49.92          | 585.40               | 158.30      |
|                                | 2016     | 0.00               | 31.06                 | 344.06                             | 76.56          | 64.80                | 33.08       |
| Sulejów                        | 2015     | 1.69               | 482.75                | 0.00                               | 157.33         | 72.81                | 224.35      |
|                                | 2016     | 2.46               | 116.63                | 90.23                              | 43.64          | 246.96               | 99.68       |
| Białogard                      | 2015     | 1.99               | 119.65                | 6.99                               | 23.60          | 75.82                | 57.15       |
|                                | 2016     | 0.00               | 7.26                  | 617.58                             | 50.07          | 72.72                | 8.00        |
| Tomaszów Bolesławiecki         | 2015     | 0.00               | 8.40                  | 1000.16                            | 27.90          | 324.09               | 21.18       |
|                                | 2016     | 2.08               | 334.06                | 239.72                             | 46.13          | 130.60               | 161.48      |
| Ruska Wieś                     |          | 0,91               | 17.81                 | 1885.93                            | 871.62         | 533.82               | 25.43       |
| Bezek                          |          | 1,04               | 132.28                | 1947.87                            | 202.70         | 78.21                | 54.34       |
| Kościelna wisi                 |          | 1,40               | 188.76                | 118.08                             | 150.71         | 0.92                 | 80.55       |
| Pawłowice                      |          | 5,07               | 104.35                | 27.99                              | 58.13          | 57.60                | 86.41       |
| Sulejów                        |          | 4,90               | 47.19                 | 885.74                             | 39.20          | 110.81               | 57.01       |
| Białogard                      |          | 5,56               | 115.75                | 892.88                             | 55.39          | 346.13               | 85.15       |
| Tomaszów Bolesławicki          |          | 5,08               | 127.90                | 189.19                             | 63.24          | 325.10               | 95.69       |
| 2015                           |          | 3,63               | 172.44                | 191.15                             | 288.50         | 298.13               | 97.97       |
| 2016                           |          | 1,05               | 89.29                 | 967.79                             | 82.67          | 111.06               | 57.63       |
| Tukey HSD test (LSD at p-0.01) | AxB      | 4.68               | 301.6381              | 1227.371                           | 807.8753       | 293.3556             | 146.26      |
|                                | A        | 3.31               | 213.2903              | 867.8825                           | 571.2541       | 207.4338             | 103.42      |
|                                | B        | 1.77               | 114.0085              | 463.9027                           | 305.3482       | 110.8780             | 42.21       |

**Table S3.** Mean ten-day air temperatures in 2014-2016 (°C) across locations (\*climatic regions).

| Year | Month | Days  | Ruska<br>Wieś | Bezek | Kościelna<br>Wieś | Pawłowice | Sulejów | Białogard | Tomaszów<br>Bol. |
|------|-------|-------|---------------|-------|-------------------|-----------|---------|-----------|------------------|
|      |       |       | 5B*           | 6A    |                   | 6B        |         | 7A        |                  |
| 2014 | Sep   | 1-10  | 15.4          | 16.8  | 16.4              | 17.3      | 15.7    | 15.3      | 15.9             |
|      |       | 11-20 | 16.2          | 16.5  | 17.2              | 17.1      | 15.8    | 15.5      | 16.1             |
|      |       | 21-30 | 11.4          | 11.6  | 12.6              | 12.3      | 11.3    | 12.3      | 12.1             |
|      | Oct   | 1-10  | 10.6          | 11.7  | 12.7              | 12.6      | 11.4    | 12.6      | 12.9             |
|      |       | 11-20 | 11.2          | 14.4  | 13.5              | 13.9      | 12.7    | 12.9      | 13               |
|      |       | 21-31 | 3.4           | 4.8   | 6.4               | 6.7       | 4.8     | 7.9       | 6.8              |
|      | Nov   | 1-10  | 6.7           | 10.5  | 9.4               | 9.4       | 9.6     | 8.6       | 8.2              |
|      |       | 11-20 | 3.1           | 5.1   | 6.8               | 8.7       | 6       | 6.8       | 6.6              |
|      |       | 21-30 | -2.3          | -2.2  | 1.5               | 2         | -0.2    | 2.6       | 1.5              |
|      | Dec   | 1-10  | -3.2          | -3.1  | -0.3              | -0.7      | -1.4    | -0.5      | -0.1             |
|      |       | 11-20 | 2.6           | 4.4   | 4.6               | 4.5       | 3.3     | 4.6       | 4.8              |
|      |       | 21-31 | -3.3          | -1.6  | 0                 | 1.2       | -1.3    | 0.9       | 1.6              |
| 2015 | Jan   | 1-10  | -2.1          | -2.2  | 1                 | -1.7      | -0.7    | 2.6       | 2.4              |
|      |       | 11-20 | 1.3           | 3.4   | 3.5               | 4.3       | 3       | 3.9       | 3.3              |
|      |       | 21-31 | -1.3          | 0.9   | 0.7               | 0.4       | -0.6    | 0.8       | 0.5              |
|      | Feb   | 1-10  | -2.4          | -1.9  | -0.8              | -3.7      | -2.6    | 0         | -1.2             |
|      |       | 11-20 | -1.5          | 0.2   | 1.8               | 0.4       | 0.5     | 1.5       | 0.9              |
|      |       | 21-28 | 2.1           | 5.2   | 4.6               | 3.9       | 3.3     | 3.1       | 2.3              |
|      | Mar   | 1-10  | 3.4           | 3.8   | 4.6               | 3.4       | 3.4     | 4.6       | 4.4              |

|      |     |       |      |      |      |      |      |      |      |
|------|-----|-------|------|------|------|------|------|------|------|
| 2016 |     | 11-20 | 4.7  | 4.7  | 5.3  | 4.8  | 3.7  | 4.3  | 4    |
|      |     | 21-31 | 5.3  | 7.6  | 5.9  | 7.8  | 5.6  | 4.8  | 5.3  |
|      | Apr | 1-10  | 4.6  | 4.5  | 4.4  | 4.1  | 3.7  | 4.7  | 3.8  |
|      |     | 11-20 | 7.6  | 8.5  | 9.1  | 9.6  | 7.5  | 8.2  | 8.3  |
|      |     | 21-30 | 10.9 | 12.5 | 11.5 | 11.5 | 10.7 | 9.6  | 9.9  |
|      | May | 1-10  | 11.2 | 13.1 | 12.1 | 12.7 | 12.1 | 10.9 | 11.9 |
|      |     | 11-20 | 11.1 | 13   | 13   | 12.6 | 12.5 | 10.8 | 11.3 |
|      |     | 21-31 | 12.6 | 13.9 | 13.7 | 12.2 | 12.7 | 10.9 | 12.1 |
|      | Jun | 1-10  | 15.5 | 18.8 | 17.5 | 18.8 | 16.9 | 13.3 | 15.2 |
|      |     | 11-20 | 15.3 | 17.2 | 16.7 | 17.1 | 16.2 | 13.8 | 15.2 |
|      |     | 21-30 | 14.7 | 16.6 | 15.7 | 15.4 | 15.4 | 14.2 | 14.6 |
|      | Jul | 1-10  | 19.4 | 21.2 | 20.9 | 21   | 20.1 | 19.8 | 19.8 |
|      |     | 11-20 | 16.6 | 19.8 | 20.4 | 21.9 | 19.8 | 16.4 | 19.3 |
|      |     | 21-31 | 17.1 | 20.6 | 19.8 | 21.8 | 19.7 | 16.3 | 19   |
|      | Aug | 1-10  | 22.3 | 24.5 | 24.2 | 23.8 | 23.7 | 20.1 | 23.8 |
|      |     | 11-20 | 20.2 | 21.5 | 23.3 | 23.7 | 22.5 | 20.7 | 22.7 |
|      |     | 21-31 | 19.3 | 21.3 | 20.6 | 20.9 | 20.1 | 18.7 | 19.2 |
|      | Sep | 1-10  | 14.8 | 16.2 | 15.9 | 15.9 | 15.7 | 14.5 | 15.1 |
|      |     | 11-20 | 16.3 | 18   | 17.6 | 18   | 17.9 | 15.4 | 16.1 |
|      |     | 21-30 | 12.9 | 13.3 | 12.8 | 12.2 | 12.4 | 11.4 | 10.6 |
|      | Oct | 1-10  | 7.9  | 9.4  | 9.9  | 9.7  | 9.1  | 9.1  | 9.4  |
|      |     | 11-20 | 6    | 6.8  | 5.8  | 7.2  | 6.6  | 5.9  | 4.4  |
|      |     | 21-31 | 5.6  | 6.6  | 7.5  | 8.1  | 7.3  | 7.6  | 7.4  |
|      | Nov | 1-10  | 5.5  | 5.9  | 7.6  | 7.6  | 6.3  | 8    | 7.9  |
|      |     | 11-20 | 7.2  | 8.8  | 9.1  | 9.3  | 9    | 8.8  | 9.3  |
|      |     | 21-30 | 0    | 1.3  | 1.7  | 0.6  | 1.1  | 2.6  | 1.9  |
|      | Dec | 1-10  | 4.3  | 4.2  | 6.6  | 4.8  | 5.6  | 6.1  | 6.1  |
|      |     | 11-20 | 2.8  | 3    | 4.2  | 3.9  | 4    | 4.5  | 5.9  |
|      |     | 21-31 | 1.8  | 3.5  | 5.6  | 4.1  | 4.3  | 5.9  | 6.4  |
|      | Jan | 1-10  | -11  | -8.3 | -6.5 | -8.1 | -7.3 | -7.6 | -4   |
|      |     | 11-20 | -5.2 | -3.9 | -2.2 | -1.9 | -2.7 | -0.7 | -3.5 |
|      |     | 21-30 | -1.2 | -1.1 | 1.6  | 0.9  | 0.1  | 2.1  | 1.6  |
|      | Feb | 1-10  | 3.1  | 4.3  | 6.5  | 5.2  | 5.2  | 5.5  | 5.1  |
|      |     | 11-20 | 0.8  | 3.6  | 3.2  | 3    | 2.8  | 0.7  | 2.1  |
|      |     | 21-28 | 0.5  | 2.7  | 3.9  | 3    | 2.7  | 2.2  | 2.4  |
|      | Mar | 1-10  | 1.8  | 4    | 2.9  | 3.4  | 3.4  | 2.2  | 1.2  |
|      |     | 11-20 | 1.3  | 3.3  | 2.8  | 2.8  | 2.7  | 3    | 2.6  |
|      |     | 21-31 | 4.8  | 4.6  | 6.3  | 6.6  | 5.5  | 5.2  | 6.2  |
|      | Apr | 1-10  | 8.9  | 10.7 | 10.1 | 9.3  | 9.6  | 9.1  | 8.8  |
|      |     | 11-20 | 9.3  | 10.4 | 9.9  | 9.2  | 10.1 | 8.8  | 8.3  |
|      |     | 21-30 | 6.1  | 7.3  | 7.1  | 5.9  | 6.6  | 5.8  | 5.6  |
|      | May | 1-10  | 14.3 | 13.5 | 13.5 | 12.5 | 12.9 | 12.6 | 11   |
|      |     | 11-20 | 11.9 | 12   | 13.4 | 11.7 | 11.7 | 11.7 | 12   |
|      |     | 21-31 | 17.9 | 18.2 | 19.4 | 17.4 | 18.3 | 19   | 16.6 |
|      | Jun | 1-10  | 16.2 | 16.2 | 17.7 | 16.3 | 15.8 | 16.8 | 16.8 |
|      |     | 11-20 | 16   | 17.3 | 17.3 | 16.8 | 17.1 | 15.1 | 16   |
|      |     | 21-30 | 20.4 | 21.6 | 21.2 | 20.9 | 21.2 | 19.7 | 18.7 |
|      | Jul | 1-10  | 17.4 | 18.9 | 18.7 | 17.8 | 18   | 17.5 | 17.3 |

|            |       |      |      |      |      |      |      |      |
|------------|-------|------|------|------|------|------|------|------|
| <b>Aug</b> | 11-20 | 17.9 | 19.3 | 18.9 | 18.3 | 18.3 | 17.5 | 17.6 |
|            | 21-31 | 20.5 | 22   | 21.3 | 20.3 | 20   | 18.9 | 19.9 |
|            | 1-10  | 18   | 20.2 | 18.7 | 19.2 | 18.8 | 16.9 | 17.2 |
|            | 11-20 | 15.5 | 17.1 | 16.9 | 16.6 | 16.3 | 15.6 | 15.8 |
|            | 21-31 | 19.1 | 20   | 19.2 | 18.5 | 18.6 | 18.3 | 18.2 |
|            |       |      |      |      |      |      |      |      |

**Table S4.** Ten-day precipitation totals in 2014-2016 (°C) across locations (\*climatic regions).

| Year | Month | Days  | Ruska<br>Wieś | Bezek | Kościelna<br>Wieś | Pawłowice | Sulejów | Białogard | Tomaszów<br>Bol. |
|------|-------|-------|---------------|-------|-------------------|-----------|---------|-----------|------------------|
|      |       |       | 5B*           | 6A    |                   | 6B        |         | 7A        |                  |
| 2014 | Sep   | 1-10  | 3.4           | 18.7  | 49.6              | 54.5      | 11.7    | 21.1      | 35.4             |
|      |       | 11-20 | 1.6           | 5.2   | 17.8              | 31.5      | 12.2    | 32.2      | 20.4             |
|      |       | 21-30 | 18.1          | 21.5  | 9.2               | 26        | 16.1    | 36.1      | 11.1             |
|      | Oct   | 1-10  | 0             | 0     | 0.4               | 0.2       | 13.9    | 3.9       | 0                |
|      |       | 11-20 | 23.4          | 2.5   | 8.3               | 12.7      | 11.2    | 33.9      | 14.5             |
|      |       | 21-31 | 0             | 27.8  | 13.6              | 40.6      | 13.6    | 3.6       | 22.7             |
|      | Nov   | 1-10  | 9.4           | 0.8   | 6                 | 13.3      | 19.2    | 2.4       | 3.3              |
|      |       | 11-20 | 0.6           | 8.4   | 8                 | 9.7       | 3.5     | 5         | 8.9              |
|      |       | 21-30 | 4.6           | 5.9   | 5.7               | 0         | 6.7     | 6.8       | 3                |
|      | Dec   | 1-10  | 1             | 0.8   | 0                 | 3.2       | 0.5     | 3.9       | 0.3              |
|      |       | 11-20 | 16            | 12.5  | 15.3              | 9.1       | 23      | 42.9      | 26.8             |
|      |       | 21-31 | 15.5          | 27.6  | 10.6              | 12        | 20.3    | 91.1      | 9.3              |
| 2015 | Jan   | 1-10  | 25.4          | 12.3  | 13.7              | 26.9      | 13.6    | 36.2      | 33.8             |
|      |       | 11-20 | 13.4          | 4.2   | 1.9               | 12        | 8.2     | 12.4      | 8                |
|      |       | 21-31 | 22.6          | 15.8  | 6.1               | 17        | 14.2    | 11.7      | 14.6             |
|      | Feb   | 1-10  | 11.1          | 2.3   | 7.8               | 9.3       | 6.8     | 8.7       | 4                |
|      |       | 11-20 | 1.2           | 0.2   | 0.1               | 0.5       | 0.2     | 0         | 0.1              |
|      |       | 21-28 | 3.6           | 0.7   | 0.4               | 6.6       | 9.8     | 2         | 0.1              |
|      | Mar   | 1-10  | 12.8          | 4.9   | 2                 | 5.5       | 10.2    | 21.3      | 8.8              |
|      |       | 11-20 | 0             | 14.2  | 5.2               | 10.9      | 8.6     | 0         | 9.7              |
|      |       | 21-31 | 15.6          | 19.5  | 21.1              | 13.7      | 28.5    | 44.1      | 35.3             |
|      | Apr   | 1-10  | 12            | 11.2  | 12.7              | 6.7       | 8.8     | 6.8       | 6.6              |
|      |       | 11-20 | 2.4           | 5.8   | 0                 | 0.7       | 2.2     | 5.1       | 2.1              |
|      |       | 21-30 | 6             | 16.7  | 4.1               | 3.4       | 29.6    | 13.4      | 11.8             |
|      | May   | 1-10  | 71.5          | 15.2  | 9.1               | 20.5      | 28.5    | 32.3      | 17.2             |
|      |       | 11-20 | 18.8          | 3.7   | 8.1               | 5.4       | 21.2    | 25.1      | 11.4             |
|      |       | 21-31 | 9.5           | 43.3  | 0                 | 15.1      | 16.8    | 7.3       | 2.1              |
|      | Jun   | 1-10  | 0.4           | 2.4   | 2                 | 2.4       | 6.5     | 1         | 20.2             |
|      |       | 11-20 | 1             | 6.7   | 5.2               | 24.3      | 35.7    | 50        | 25.2             |
|      |       | 21-30 | 21.1          | 6.4   | 19.8              | 21.7      | 8.2     | 44.2      | 19.9             |
|      | Jul   | 1-10  | 12.2          | 16.2  | 8.8               | 4.6       | 6.4     | 11.7      | 19.5             |
|      |       | 11-20 | 9.2           | 14.3  | 13.3              | 29.9      | 44.2    | 18.4      | 42.7             |
|      |       | 21-31 | 38.4          | 14.9  | 7.8               | 9.8       | 18.4    | 54.6      | 11.8             |
|      | Aug   | 1-10  | 1             | 0     | 0                 | 3.5       | 2       | 5.1       | 1.4              |
|      |       | 11-20 | 0             | 0     | 10.2              | 7         | 16.7    | 0         | 6.7              |
|      |       | 21-31 | 24            | 6.9   | 3.4               | 5.4       | 3.4     | 12.6      | 4.4              |
|      | Sep   | 1-10  | 19.1          | 36.5  | 7                 | 26.1      | 15.5    | 64.5      | 29.9             |
|      |       | 11-20 | 55.4          | 24.4  | 8.7               | 12.2      | 18.1    | 20.5      | 4.6              |

|      |     |       |      |      |      |      |       |      |      |
|------|-----|-------|------|------|------|------|-------|------|------|
| 2016 | Oct | 21-30 | 5.2  | 33.4 | 0    | 0.5  | 2.4   | 9.9  | 0    |
|      |     | 1-10  | 0    | 0    | 0    | 0    | 0     | 0    | 4.9  |
|      |     | 11-20 | 7.6  | 23.9 | 36.8 | 18.4 | 40.7  | 23.9 | 46.7 |
|      |     | 21-31 | 7.6  | 20.4 | 1.9  | 3.1  | 1     | 1.7  | 0.7  |
|      | Nov | 1-10  | 56.8 | 10.5 | 6.8  | 8.3  | 5.8   | 29.2 | 6.5  |
|      |     | 11-20 | 49   | 27.9 | 23.2 | 52.1 | 26    | 39.9 | 37   |
|      |     | 21-30 | 3.2  | 8.3  | 9.7  | 17.9 | 11.1  | 19.9 | 16.5 |
|      | Dec | 1-10  | 4    | 3.3  | 3.5  | 8    | 1.3   | 5.4  | 4.4  |
|      |     | 11-20 | 28.2 | 18.7 | 14.4 | 11.4 | 13.8  | 32.7 | 11.3 |
|      |     | 21-31 | 28.2 | 2    | 1.7  | 2.5  | 2.5   | 36.7 | 0.5  |
|      | Jan | 1-10  | 1.3  | 7.5  | 5.8  | 2.3  | 6.4   | 6.5  | 7.9  |
|      |     | 11-20 | 11.5 | 23.4 | 15.1 | 28.5 | 23    | 7.5  | 18.6 |
|      |     | 21-30 | 14   | 11.1 | 9    | 14.3 | 7.1   | 26.5 | 22.6 |
|      | Feb | 1-10  | 28.2 | 3.9  | 8    | 26   | 28    | 12.6 | 11.1 |
|      |     | 11-20 | 29.6 | 28.6 | 20.6 | 40.8 | 29.2  | 20.8 | 9.4  |
|      |     | 21-28 | 19.2 | 22.4 | 21.4 | 25.1 | 26    | 18.6 | 27.9 |
|      | Mar | 1-10  | 11.2 | 30.7 | 15.3 | 13.1 | 13.5  | 10.2 | 18.4 |
|      |     | 11-20 | 7    | 8.5  | 5.9  | 7.6  | 6.8   | 0.5  | 10.7 |
|      |     | 21-31 | 8.2  | 12.4 | 21.8 | 4.9  | 18.9  | 15   | 27.1 |
|      | Apr | 1-10  | 1.4  | 15.4 | 18.7 | 28.7 | 18.7  | 0.6  | 23.1 |
|      |     | 11-20 | 7.4  | 28   | 13.9 | 16.4 | 8.3   | 14.6 | 13.1 |
|      |     | 21-30 | 22.4 | 20.2 | 6.1  | 11.9 | 11.7  | 12.9 | 6.3  |
|      | May | 1-10  | 0    | 6    | 1.5  | 24.6 | 6.9   | 0    | 15.3 |
|      |     | 11-20 | 42   | 43   | 11.2 | 7    | 12.9  | 35.2 | 1.5  |
|      |     | 21-31 | 7.6  | 1.5  | 21   | 14.2 | 21.7  | 38.7 | 16.8 |
|      | Jun | 1-10  | 5.8  | 1.6  | 10.4 | 11.9 | 26.5  | 10.7 | 6.9  |
|      |     | 11-20 | 31   | 56.4 | 51.6 | 20.3 | 21.8  | 42.1 | 80.8 |
|      |     | 21-30 | 10.2 | 1.8  | 3.3  | 29.1 | 28.3  | 30   | 7.9  |
|      | Jul | 1-10  | 39.4 | 14.2 | 8.9  | 31.1 | 23.9  | 83.9 | 28.8 |
|      |     | 11-20 | 62.3 | 56.2 | 60.9 | 57.7 | 136.6 | 51.5 | 95   |
|      |     | 21-31 | 31.9 | 61.7 | 26   | 22   | 25.6  | 36.3 | 8.8  |
|      | Aug | 1-10  | 38.6 | 27.9 | 5.8  | 29.4 | 24.1  | 37.2 | 27.3 |
|      |     | 11-20 | 13   | 5.4  | 0.9  | 0.5  | 0.1   | 36   | 23.8 |
|      |     | 21-31 | 23.2 | 17.2 | 25.5 | 11.6 | 11    | 6.4  | 10.7 |

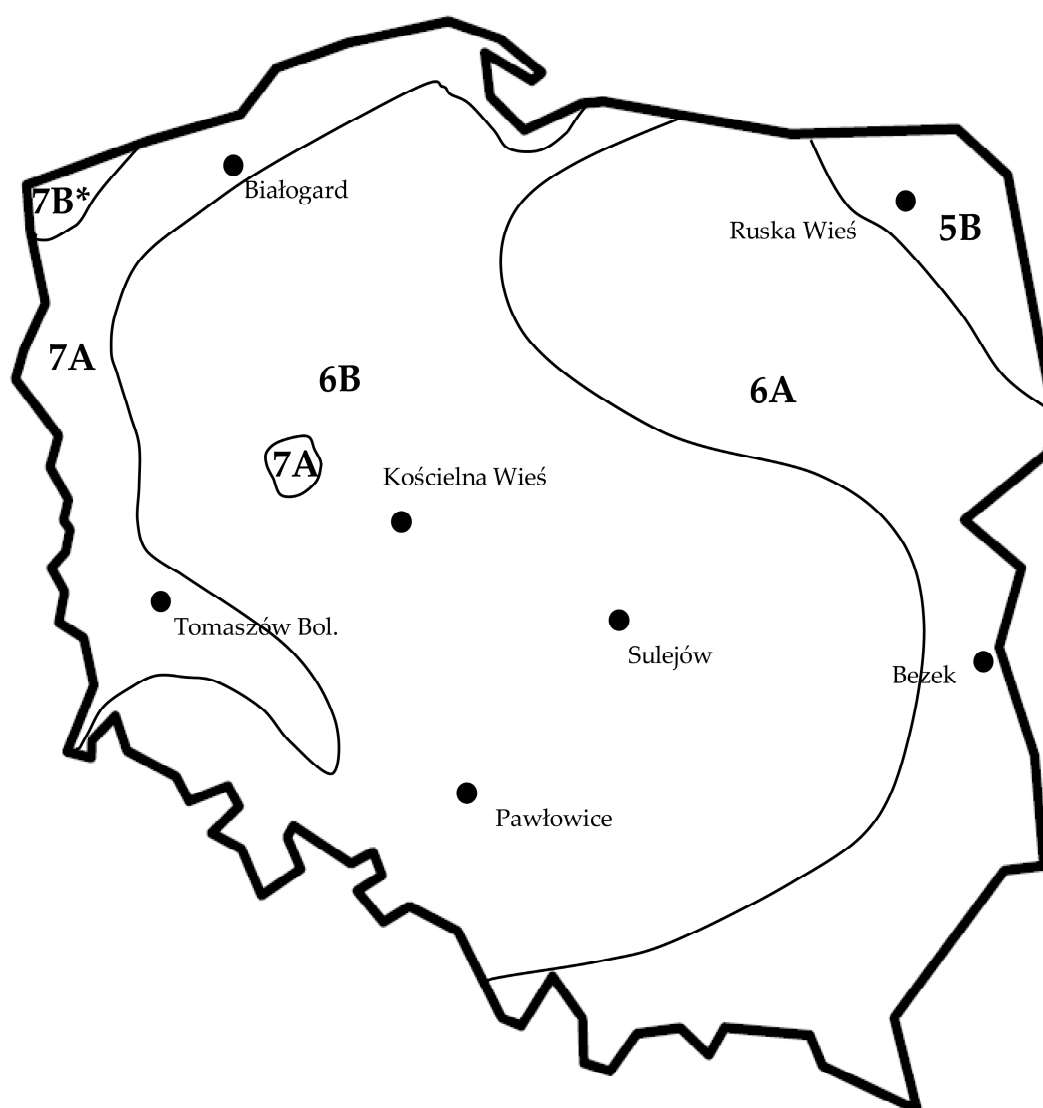

**Figure S1.** Map of Poland including specific locations and climatic regions (7B\*-zone not represented in this study).
